# Supplementary material for: Fe/Fe3C nanoparticles in situ-doped with carbon nanofibers embedded in rGO as high-performance anode electrocatalysts of microbial fuel cells
Source: Royal Society of Chemistry journal article supplement (doi:10.1039/d3ta05623f), 2024-01-01
Supplement: d3ta05623f1.pdf [file d3ta05623f1.pdf]

*supplementary materials*

**Fe/Fe<sub>3</sub>C nanoparticles in-situ doped carbon nanofiber  
embedded in rGO as high-performance anode  
electrocatalysts of microbial fuel cells**

Tingli Ren<sup>a</sup>, Yuanfeng Liu<sup>a</sup>, Xiaoqiu Lin<sup>a</sup>, Congju Li<sup>\*,a</sup>

*<sup>a</sup> School of Energy and Environmental Engineering, University of Science and Technology Beijing, Beijing 100083, China; Beijing Key Laboratory of Resource-oriented Treatment of Industrial pollutants, Beijing 100083, China*

Corresponding Author.

*E-mail address:* congjuli@126.com (Congju Li)

**Table S1** The components of solution in MFCs.

| Samples              | Components                            | Purity | Source                     | Contents (L <sup>-1</sup> ) |
|----------------------|---------------------------------------|--------|----------------------------|-----------------------------|
| The anode solution   | CH <sub>3</sub> COONa                 | ≥98%   | Sigma-Aldrich              | 1 g                         |
|                      | NH <sub>4</sub> Cl                    | ≥99%   | Macklin                    | 0.1 g                       |
|                      | NaCl                                  | ≥99%   | Hopebio                    | 0.5 g                       |
|                      | NaHCO <sub>3</sub>                    | ≥99%   | Sinopharm Chemical Reagent | 1 g                         |
|                      | KH <sub>2</sub> PO <sub>4</sub>       | ≥99%   | Macklin                    | 0.53 g                      |
|                      | Na <sub>2</sub> HPO <sub>4</sub>      | ≥99%   | Macklin                    | 3.3 g                       |
|                      | Trace element                         |        |                            | 1 ml                        |
|                      | Vitamin solution                      |        | 1 ml                       |                             |
| The cathode solution | K <sub>3</sub> [Fe(CN) <sub>6</sub> ] | ≥99%   | Yong Da Chemical Reagent   | 16.4 g                      |
| Trace element        | HCl (25%)                             | 37%    | Sinopharm Chemical Reagent | 10 mL                       |
|                      | FeCl <sub>3</sub> · 4H <sub>2</sub> O | ≥98%   | Sigma-Aldrich              | 1.5 g                       |

|                  |                                     |      |               |        |
|------------------|-------------------------------------|------|---------------|--------|
|                  | ZnCl <sub>2</sub>                   | ≥99% | Sigma-Aldrich | 0.07 g |
|                  | MnCl <sub>4</sub> 4H <sub>2</sub> O | ≥99% | Sigma-Aldrich | 0.1 g  |
|                  | CoCl <sub>2</sub> 6H <sub>2</sub> O | 98%  | Sigma-Aldrich | 0.19 g |
|                  | CuCl <sub>2</sub> 2H <sub>2</sub> O | ≥99% | Sigma-Aldrich | 2 mg   |
|                  | NiCl <sub>2</sub> 6H <sub>2</sub> O | ≥98% | Sigma-Aldrich | 0.02 g |
|                  | NaMoO <sub>4</sub> H <sub>2</sub> O | ≥99% | Sigma-Aldrich | 0.04 g |
|                  | Biotin                              | ≥98% | Sigma-Aldrich | 20 mg  |
|                  | Folic acid                          | ≥98% | Sigma-Aldrich | 20 mg  |
|                  | pyridoxine-HCl                      | ≥98% | Sigma-Aldrich | 100 mg |
| vitamin solution | Thiamine-HCl 2H <sub>2</sub> O      | ≥99% | Sigma-Aldrich | 50 mg  |
|                  | riboflavin                          | 100% | Santa cruz    | 50 mg  |
|                  | nicotinic acid                      | ≥99% | Absin         | 50 mg  |
|                  | D-Ca-pantothenate                   | ≥98% | Sigma-Aldrich | 50 mg  |

---

|                               |      |                 |       |
|-------------------------------|------|-----------------|-------|
| vitamin B12                   | ≥99% | Cayman chemical | 50 mg |
| para-aminobenzoic acid (PABA) | ≥99% | Sigma-Aldrich   | 50 mg |
| thioctic acid                 | ≥98% | Raybiotech      | 50 mg |
| nicotinamide                  | ≥98% | Absin           | 50 mg |
| lipoic acid                   | ≥98% | Sigma-Aldrich   | 50 mg |
| hemin                         | ≥90% | Sigma-Aldrich   | 50 mg |
| 1,2-Nnphthoquinone            | ≥99% | Sigma-Aldrich   | 50 mg |
| vitamin K2                    | ≥98% | Cayman chemical | 50 mg |

---

## 1. Calculation methods:

### 1.1 The specific capacitance ( $C_p$ ) values

The specific capacitance ( $\text{mF cm}^{-2}$ ) of the electrode materials can be calculated based on the following formula,

$$C_p = \frac{1}{2Ak(V_a - V_b)} \int_{V_a}^{V_b} IdV \quad (1)$$

Where  $I$  was the real-time current,  $\text{mA}$ ;  $V_a$ ,  $V_b$  and  $V$  represented the initial potential (V), the final potential (V) and the real-time potential (V), respectively;  $A$  represented the anode surface area ( $4 \text{ cm}^{-2}$ );  $k$  represented the scan rate of the CV curve,  $0.01 \text{ V s}^{-1}$  1,2.

### 1.2 The chemical oxygen demand (COD) removal efficiency

The removal efficiency of chemical oxygen demand ( $\text{mg L}^{-1}$ ) was measured according to the digestion method 3.

$$COD(\%) = \frac{(COD_{in} - COD_{out})}{COD_{in}} \times 100\% \quad (2)$$

Where  $COD_{in}$  and  $COD_{out}$  represented the inlet COD content and outlet COD content ( $\text{mg L}^{-1}$ ), respectively.

### 1.3 Coulombic efficiency (CE, %)

CE (%) was calculated based on the following formula,

$$CE = \frac{8 \int_0^t Idt}{FV\Delta COD} \quad (3)$$

Where  $I$  was the real-time current,  $\text{A}$ ;  $F$  represented Faraday constant,  $96500 \text{ C}$

$\text{mol}^{-1}$ ;  $V$  represented the volume of the anode chamber, 0.118 L;  $\Delta COD$  referred to the difference between influent and effluent,  $\text{mg L}^{-1}$ .

#### **1.4 The polarization curve and power density**

The polarization curve ( $J$ ,  $\text{mA m}^{-2}$ ) and power density ( $P$ ,  $\text{mW m}^{-2}$ ) were calculated based on LSV of MFCs, and the calculation formula is as follows.

$$P=(U \times I)/A, J=I/A \quad (4)$$

Where  $U$  was the cell voltage (V);  $R$  was the external resistance ( $\Omega$ ),  $I$  was current (A);  $A$  was electrode area (80% of the electrode area,  $\text{m}^{-2}$ ).

## 2. Experimental section

### 2.1 Preparation of NCNFs@Fe/Fe<sub>3</sub>C and NCNFs

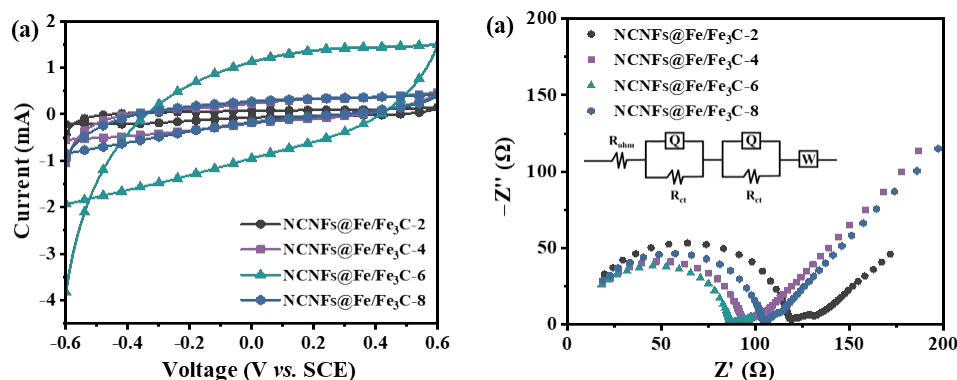

**Fig. S1.** (a) CV curves, (b) Nyquist curves of NCNFs@Fe/Fe<sub>3</sub>C-x (x=2, 4, 6, 8).

As shown in Fig. S1a, the CV curve of NCNFs@Fe/Fe<sub>3</sub>C-6 had the largest redox loop area and the highest capacitive current response, which meant that it had the best capacitive performance compared with other samples. The ohmic resistance ( $R_{ohm}$ ) and charge transfer resistance ( $R_{ct}$ ) of different anodes were obtained using the fitted equivalent circuit in the inset of Fig. S1b. They exhibited similar  $R_{ohm}$  (8.592-9.243  $\Omega$ ) while exhibiting significantly different  $R_{ct}$ . The  $R_{ct}$  of NCNFs@Fe/Fe<sub>3</sub>C-6 was 76.58  $\Omega$ , which was lower than that of NCNFs@Fe/Fe<sub>3</sub>C-2 (108.20  $\Omega$ ), NCNFs@Fe/Fe<sub>3</sub>C-4 (83.02  $\Omega$ ), NCNFs@Fe/Fe<sub>3</sub>C-8 (93.22  $\Omega$ ).

With the improving of Fe/Fe<sub>3</sub>C concentration, the electrochemical property first rose and then declined. The NCNFs@Fe/Fe<sub>3</sub>C-6 reached the maximum redox peak current and the smallest resistance. It means that the charge transfer rate of NCNFs@Fe/Fe<sub>3</sub>C-6 was the fastest, which was determined by its rough and unique surface. Comparing the electrochemical properties of NCNFs@Fe/Fe<sub>3</sub>C-x (x=2, 4, 6, 8), the NCNFs@Fe/Fe<sub>3</sub>C-6 with a relatively large capacitance and excellent

conductivity (Fig. S1), was chosen for the in-depth study, abbreviated as NCNFs@Fe/Fe<sub>3</sub>C.

## **2.2 Anode biofilms characterization**

Before SEM characterization, 5 wt% glutaraldehyde (Grade II, 25% in H<sub>2</sub>O, Sigma-Aldrich) solutions were dropped on the anode samples, chemically dehydrated with gradient contents of ethanol aqueous solutions (30–70 vol%) and dried in an oven at 40 °C for 2 h to maintain the original structures of bacterial cells.

The survival state of the bacterial cells on different anodes was observed by confocal scanning laser microscopy (CLSM, LSM800, ZEISS, Germany). For CLSM imaging, a calcein-AM/PI double staining kit composed of green fluorescent calcein AM and red fluorescent calcein PI was used to distinguish the living/dead bacterial cells.



### 3 Results and discussion

#### 3.1 Characterization of the anode materials

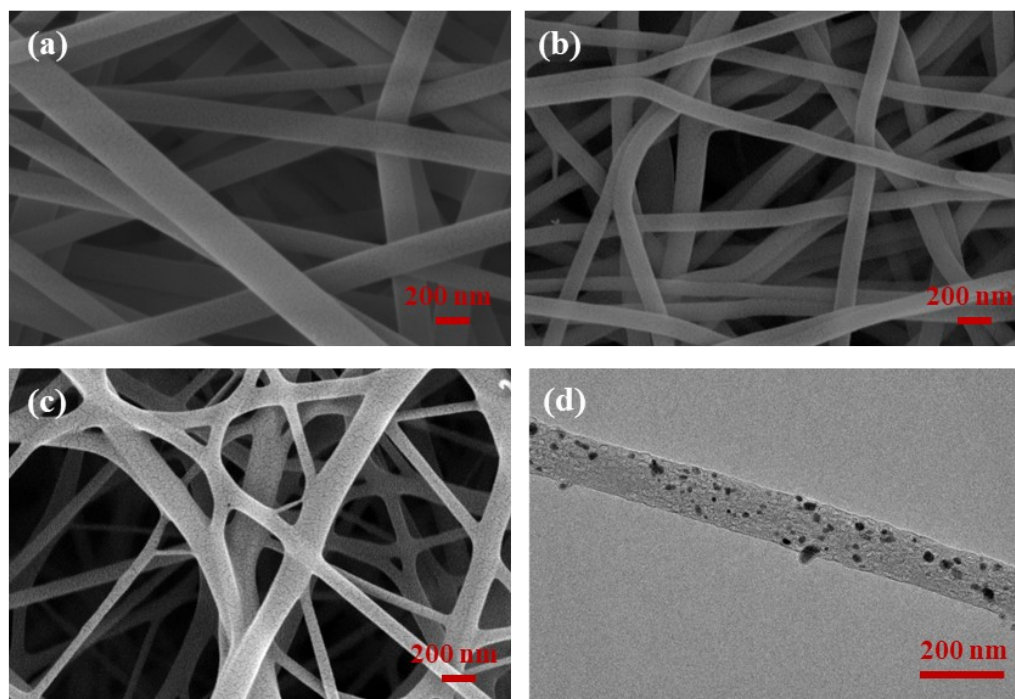

**Fig. S2.** SEM images of (a) nanofibers (NFs); (b) iron-doped nanofibers (Fe-NFs); (c) the diameter of nitrogen-doped carbon nanofibers (NCNFs); (d) TEM image of NCNFs@Fe/Fe<sub>3</sub>C.

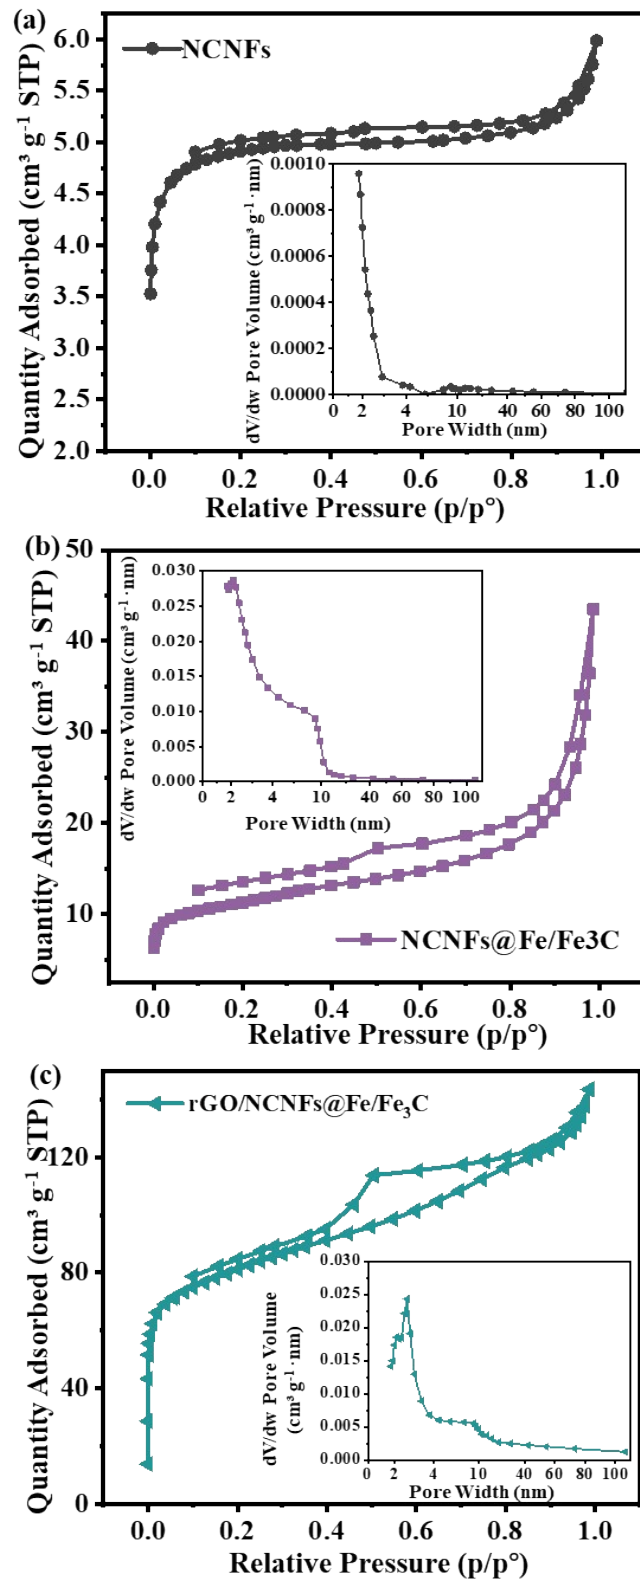

**Fig. S3.** Nitrogen adsorption–desorption isotherms and corresponding pore size distributions of (a)

NCNFs; (b) NCNFs@Fe/Fe<sub>3</sub>C and (c) rGO/NCNFs@Fe/Fe<sub>3</sub>C.

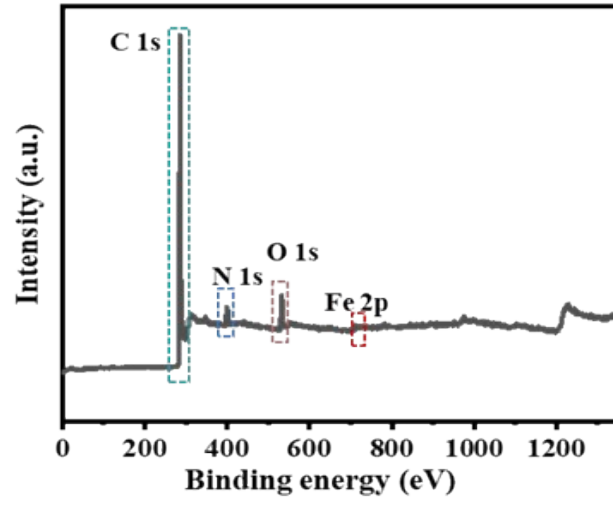

Fig. S4. The full XPS spectra

### 3.2. Electrochemical analysis

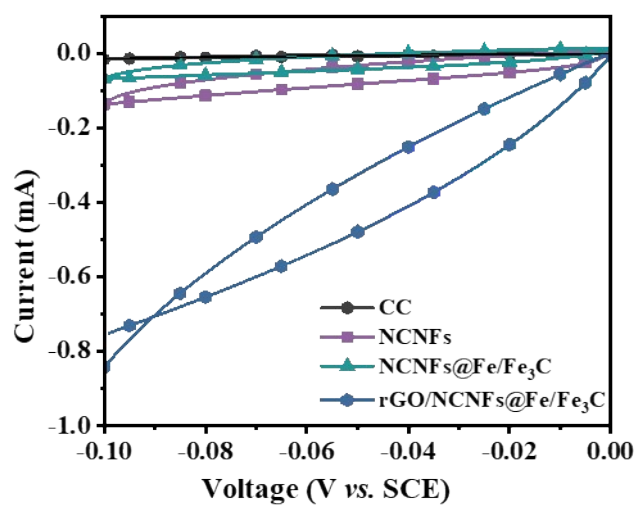

Fig. S5. CV curves of different anodes.

The CV curves of different anodes between -0.1 V and 0 V (with a scan speed of  $0.01 \text{ V s}^{-1}$ ) were measured using an electrochemical workstation with a conventional three-electrode system, as shown in Fig. S5. The prepared anodes with electrocatalysts were regarded as the working electrodes, while the graphite and saturated calomel electrode (SCE) were used as the counter and reference electrodes, respectively. Additionally, the anode solution was used as the electrolyte solution. The specific capacitance was calculated by Origin software.

**Table S2.** The fitted values of  $R_{ohm}$  and  $R_{ct}$  of different anodes.

| <b>Samples</b>                 | <b><math>R_{ohm}</math></b> | <b><math>R_{ct}</math></b> |
|--------------------------------|-----------------------------|----------------------------|
| CC                             | 6.76                        | 72.78                      |
| NCNFs                          | 6.45                        | 62.12                      |
| NCNFs@Fe/Fe <sub>3</sub> C     | 7.09                        | 58.68                      |
| rGO/NCNFs@Fe/Fe <sub>3</sub> C | 7.20                        | 57.22                      |

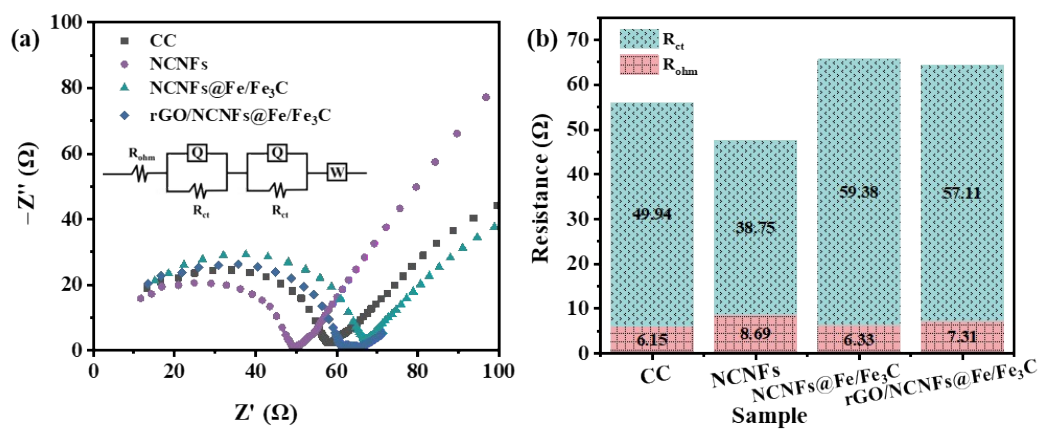

**Fig. S6.** (a) Nyquist curves, and (b) the fitted values of  $R_{ohm}$  and  $R_{ct}$  obtained at the open circuit

potential with  $Fe(CN)_6^{3-/4-}$  (1 mM each) in anode solution.

### **3.3. MFC performance**

The CV curves in Fig. 3d were measured based on MFC devices with a conventional three-electrode system. The anode and cathode of the MFCs were regarded as the working and counter electrodes, respectively, while the saturated calomel electrode (SCE) was regarded as the reference electrode , and the electrode solution for the measurement was the anode solution.

### 3.4. Biofilm morphology and structure

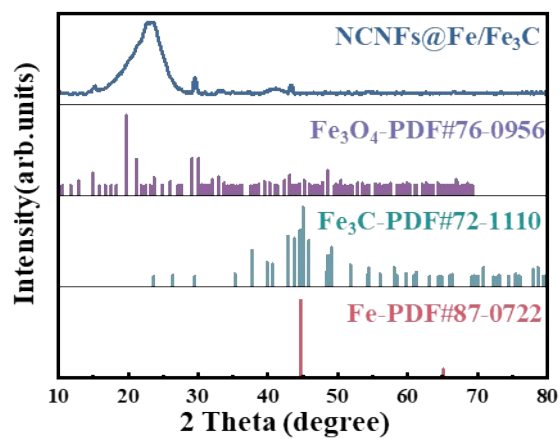

Fig. S7. The XRD image of the biofilm of the NCNFs@Fe/Fe<sub>3</sub>C anode



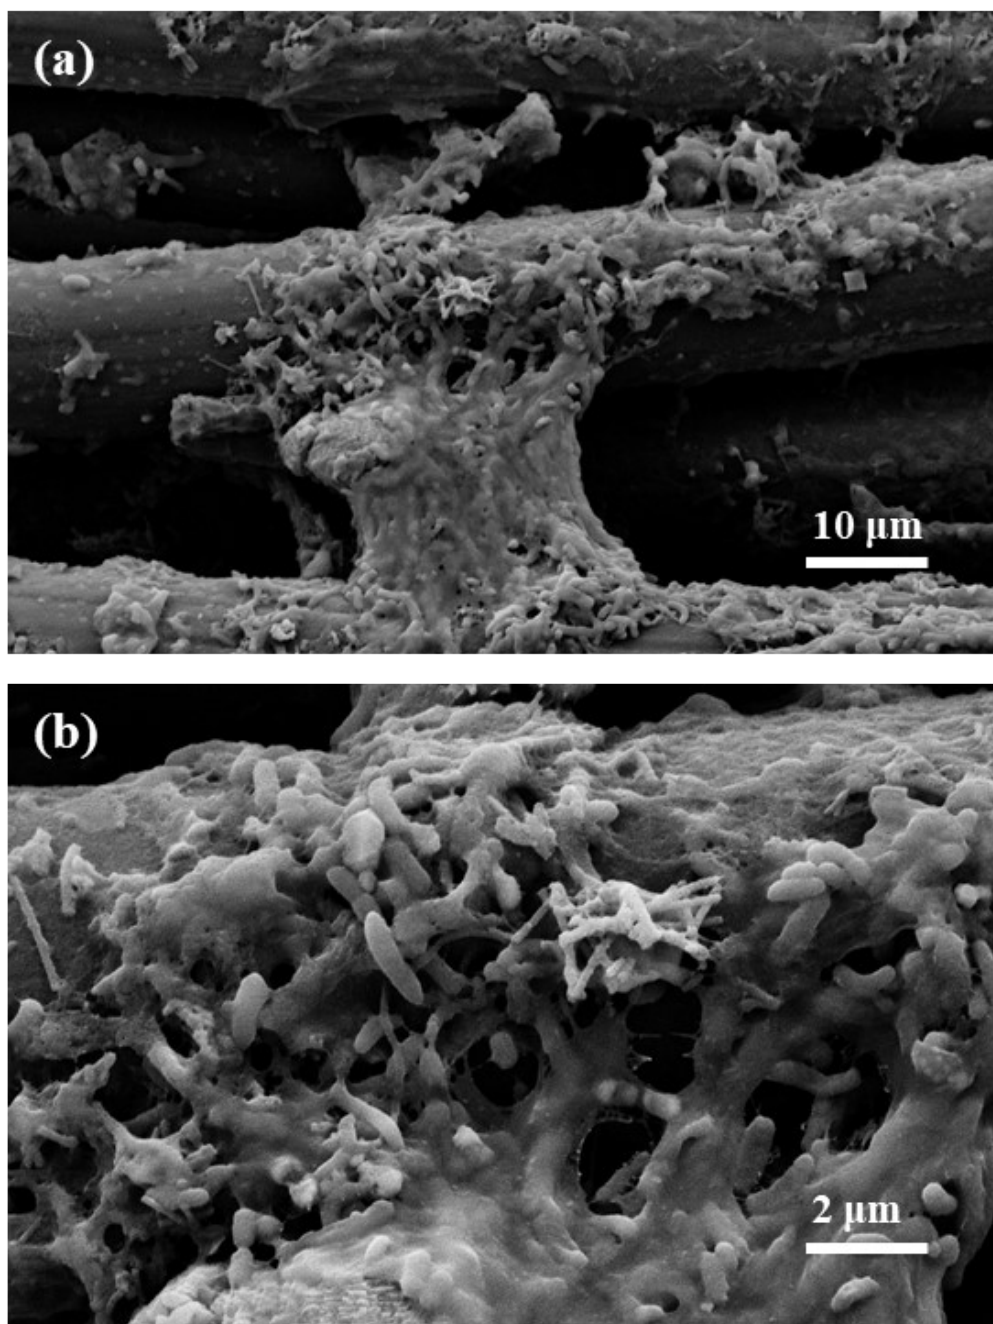

**Fig. S8.** SEM images of rGO/NCNFs@Fe/Fe<sub>3</sub>C.

The aerogel structure of rGO/NCNFs@Fe/Fe<sub>3</sub>C provided sufficient pores increasing the specific surface area of the anode. Bacteria could attach to the pores, resulting in an elevated microbial loading of the anode, which facilitated the formation of a continuous dense biofilm.

**Table S3.** Diversity and abundance index of the microbial community on different anodes.

| Samples                        | Shannon <sup>a</sup> | Simpson <sup>b</sup> | Coverage | ACE <sup>c</sup> | OTUs |
|--------------------------------|----------------------|----------------------|----------|------------------|------|
| CC                             | 1.655                | 0.262                | 1        | 18.000           | 237  |
| NCNFs                          | 1.678                | 0.212                | 0.999    | 19.458           | 262  |
| NCNFs@Fe/Fe <sub>3</sub> C     | 1.522                | 0.234                | 1        | 20.000           | 285  |
| rGO/NCNFs@Fe/Fe <sub>3</sub> C | 1.492                | 0.309                | 1        | 22.000           | 323  |

- a. The diversity index of the microbial community. A higher value indicates more diversity.
- b. The evenness index of the microbial community. A higher value indicates more evenness.
- c. The abundance index of the microbial community. A higher value indicates more abundance.

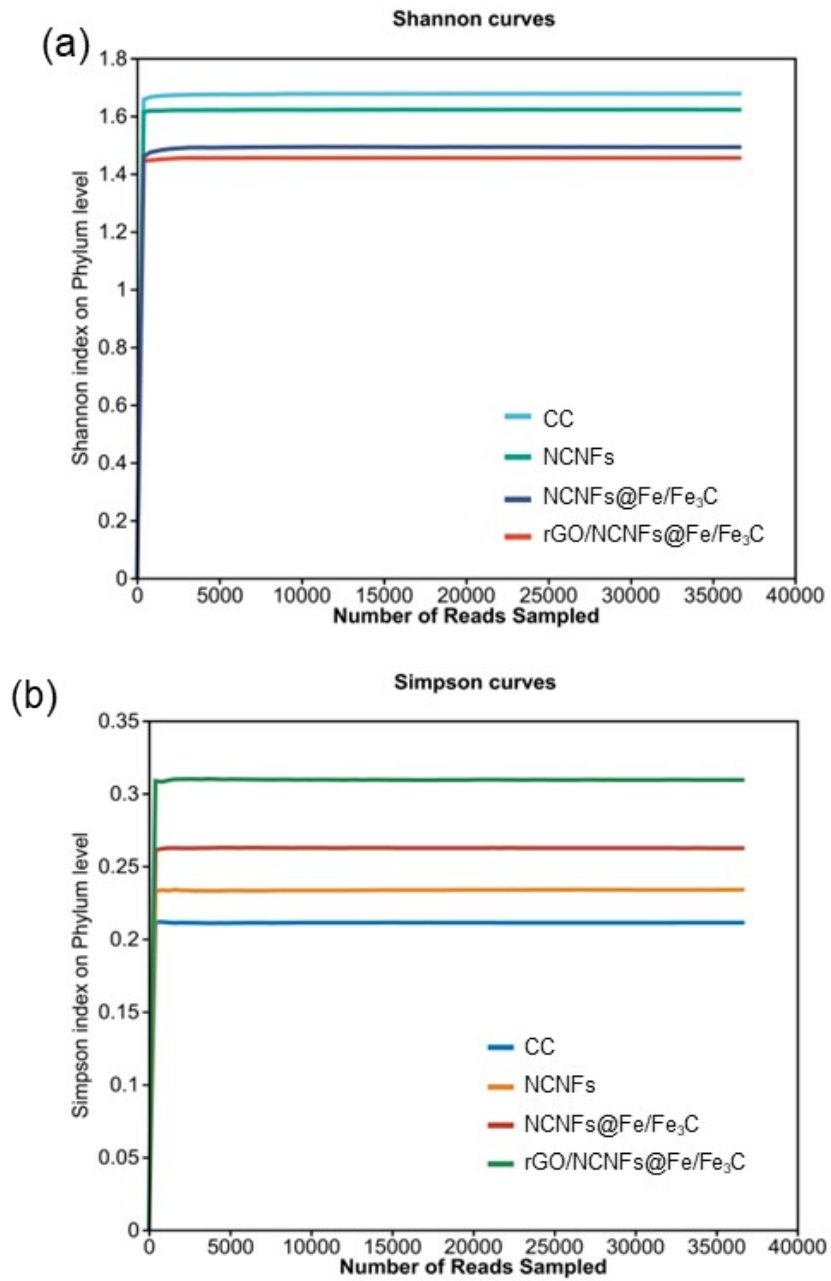

**Fig. S9.** Rarefaction curves of (a) Shannon and (b) Simpson.

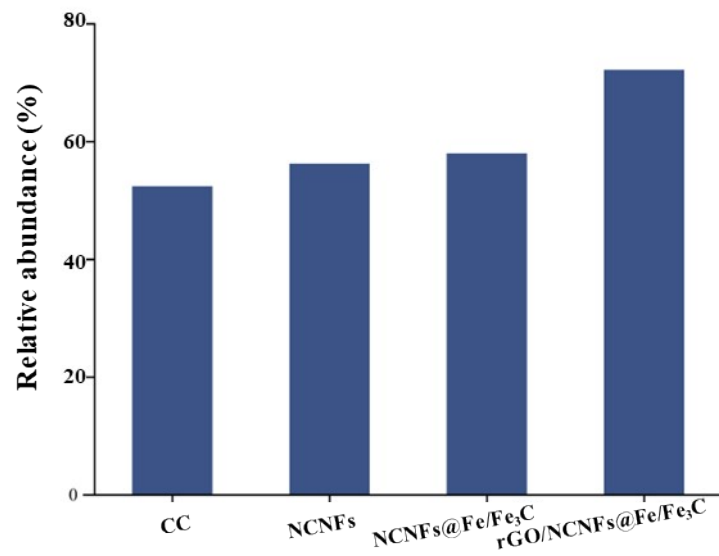

**Fig. S10.** The relative abundance of electroactive microbial communities of different anode samples at the phylum level

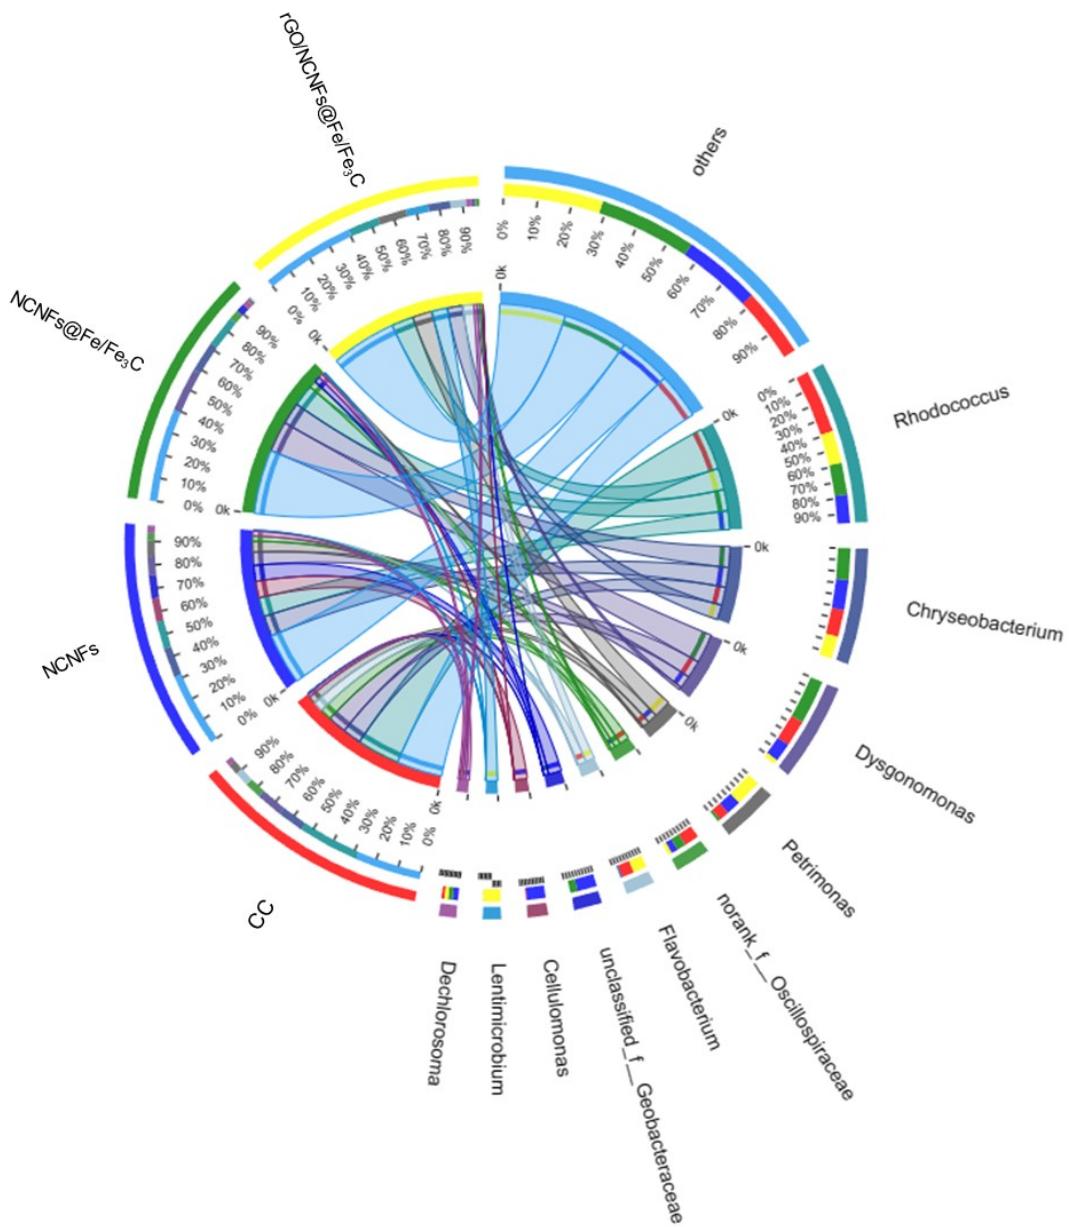

**Fig. S11.** Microbial community structure of different anode samples at the genus level

## References

1. T. Deng, X. Y. Shi, W. Zhang, Z. Z. Wang and W. T. Zheng, *Nanotechnology*, 2021, **32**, 7.
2. J. B. Tang, W. X. Huang, X. Lv and Q. W. Shi, *Nanotechnology*, 2021, **32**, 9.
3. C. Wei, H. P. Wu, Q. P. Kong, J. Y. Wei, C. H. Feng, G. L. Qiu, C. H. Wei and F. S. Li, *Journal of Environmental Management*, 2019, **246**, 324-333.
